# Supplementary material
Source: PubMed Central journal article supplement (PMC8830155)
Supplement: mmc1.pdf [file mmc1.pdf]

**SUPPLEMENTARY MATERIAL**

**Supplemental Table S1. Electrocardiogram parameters at different stages.**

|          | PR interval (ms) | QRS duration (ms) | QTc interval (ms) |
|----------|------------------|-------------------|-------------------|
| Fig. 1 A | N/A*             | 306               | N/A*              |
| Fig. 1 B | 186              | 128               | 437               |
| Fig. 1 C | 162              | 100               | 388               |

Abbreviations: N/A, not applicable

\* In Fig. 1A, it was difficult to accurately measure the PR interval and QTc interval because P waves and T waves were not clear.
